# Supplementary material for: Building focused cardiac ultrasound capacity in a lower middle-income country: A single centre study to assess training impact
Source: PubMed Central journal article supplement — Afr J Emerg Med. 2020 Jun 19;10(3):136–43. doi: 10.1016/j.afjem.2020.04.011 (PMC7474241; doi:10.1016/j.afjem.2020.04.011), 2020-06-19
Supplement: mmc1.pdf [file mmc1.pdf]

# Supplementary Material

## 1. FATE Protocol Scanning Guide

regionmidtjylland **midt**

### Focus Assessed Transthoracic Echo (FATE)

Scanning through position 1-4 in the most favourable sequence

#### Basic FATE views

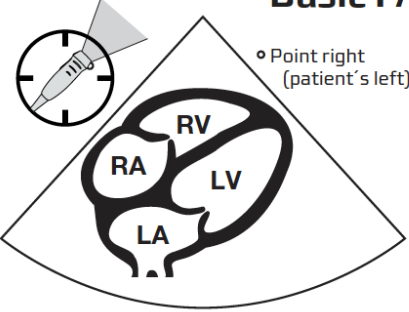

◦ Point right  
(patient's left)

**Pos 1: Subcostal 4-chamber**



Point right ◦  
(patient's left back)

**Pos 2: Apical 4-chamber**



◦ Point left  
(patient's right shoulder)

**Pos 3: Parasternal long axis**



Point right ◦  
(patient's left shoulder)

**Pos 3: Parasternal LV short axis**



◦ Point cranial

Liver/spleen

Diaphragm

Lung

**Pos 4: Pleural scanning**



Right Left

3

1

2

4

4

**2. FATE Observed Structured Clinical Exam (OSCE) Assessment Form**  
 (To be completed by the Evaluator observing the novice use of ultrasound)

Novice ID: \_\_\_\_\_

Evaluator Initials: \_\_\_\_\_

**Instructions for FATE OSCE Evaluator**

For each FATE view, the Evaluator reads the name of the view and the novice:

- a) Places the probe on the patient (Evaluator scores PO, OR)
- b) Adjusts the depth and gain and other machine settings to optimise the image
- c) Demonstrates knowledge of anatomy by pointing out relevant structures and relationships. (Evaluator scores AN)
- d) Interprets images appropriately (eg decreased ejection fraction with no pericardial effusion). (Evaluator scores IN)
- e) Freezes an image representative of findings and saves to USB flash drive. (Evaluator scores IM)

| FATE Protocol Views           | PO | OR | AN | IN | IM |
|-------------------------------|----|----|----|----|----|
| Parasternal long axis (PLAX)  |    |    |    |    |    |
| Parasternal short axis (PSAX) |    |    |    |    |    |
| Apical 4-chamber (Ap4-Ch)     |    |    |    |    |    |
| Subcostal 4-chamber           |    |    |    |    |    |
| Left pleural scan             |    |    |    |    |    |
| Right pleural scan            |    |    |    |    |    |

**OSCE Scoring System**

**PO: POsition**

- 1=the probe was placed in the correct position on the patient's chest
- 0=the probe was placed in the incorrect position

**OR: ORientation**

- 1=the selection marker was pointing in the correct direction
- 0=the selection marker was not pointing in the correct direction

**AN: ANatomy**

- 3=correctly identified and named ALL structures pertinent to image
- 2=correctly identified and named SOME structures pertinent to image, did not know all
- 1=correctly identified and named some structures but INCORRECTLY identified or named others
- 0=could not identify or name pertinent structures or named them all incorrectly

IN: INterpretation

- 3=correctly interpreted images
- 2=was able to interpret MOST images
- 1=correctly interpreted SOME images
- 0=did not correctly interpret any images

IM: IMage quality

- 4=outstanding images, no suggestions for improvement
- 3=excellent images, minor suggestions for improvement
- 2=good images, acceptable for interpretation
- 1=poor images; some anatomy discernible but not sufficient for interpretation
- 0=no meaningful image generated; no discernible anatomy

### 3. FATE Study Outcome Form

Is the person filling this form a novice or expert in focused cardiac ultrasound? (tick as appropriate)

Novice/Expert \_\_\_\_\_

Initials (experts only):

Novice ID (novices):

Patient Study ID

| <b>FoCUS target</b>            | <b>Present/Absent</b>        |                             |                                   |
|--------------------------------|------------------------------|-----------------------------|-----------------------------------|
| Reduced ejection fraction (EF) | Yes <input type="checkbox"/> | No <input type="checkbox"/> | Not sure <input type="checkbox"/> |
| Hyperdynamic contractility     | Yes <input type="checkbox"/> | No <input type="checkbox"/> | Not sure <input type="checkbox"/> |
| Right ventricular dilatation   | Yes <input type="checkbox"/> | No <input type="checkbox"/> | Not sure <input type="checkbox"/> |
| Pericardial effusion           | Yes <input type="checkbox"/> | No <input type="checkbox"/> | Not sure <input type="checkbox"/> |
| Left pleural effusion          | Yes <input type="checkbox"/> | No <input type="checkbox"/> | Not sure <input type="checkbox"/> |
| Right pleural effusion         | Yes <input type="checkbox"/> | No <input type="checkbox"/> | Not sure <input type="checkbox"/> |
| Normal scan                    | Yes <input type="checkbox"/> | No <input type="checkbox"/> | Not sure <input type="checkbox"/> |
